# Supplementary material
Source: Royal Society of Chemistry journal article supplement (doi:10.1039/d6ta01962e)
Supplement: d6ta01962e1.pdf [file d6ta01962e1.pdf]

## A Strong, Healable, Recyclable Bio-Based Adhesive via a Bone-Inspired Triple Network

Jiarong Huang <sup>a,\*</sup>, Hanbo Zhang <sup>a</sup>, Zhenze Yang <sup>a</sup>, Lingcao Tan <sup>a</sup>, Wenhua Xu <sup>a,b</sup>, Baiping Xu <sup>a</sup>

a. School of Mechanical and Automation Engineering, Jiangmen Key Laboratory of Polymer Intelligent Manufacturing, Wuyi University, Jiangmen, 529020, China

b. Key Laboratory of Polymer Processing Engineering (South China University of Technology), Ministry of Education, Guangzhou, 510640, China

Corresponding Author: Jiarong Huang ([hjr@wyu.edu.cn](mailto:hjr@wyu.edu.cn))

**Table S1.** The formulations of ESO-TA-CA adhesive

| Samples   | ESO | TA  | CA  | Industrial alcohol |
|-----------|-----|-----|-----|--------------------|
| ESO-TA-CA | (g) | (g) | (g) | (ml)               |
| 1-0.4-0.4 | 1   | 0.4 | 0.4 | 10                 |
| 1-0.4-0.5 | 1   | 0.4 | 0.5 | 10                 |
| 1-0.5-0.4 | 1   | 0.5 | 0.4 | 10                 |
| 1-0.5-0.5 | 1   | 0.5 | 0.5 | 10                 |
| 1-0.5-0.6 | 1   | 0.5 | 0.6 | 10                 |
| 1-0.6-0.4 | 1   | 0.6 | 0.4 | 10                 |

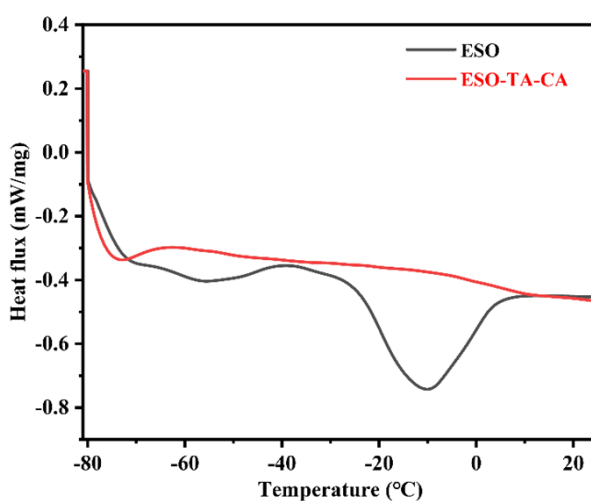

**Figure S1.** DSC of ESO and ESO/TA/CA adhesive before curing.

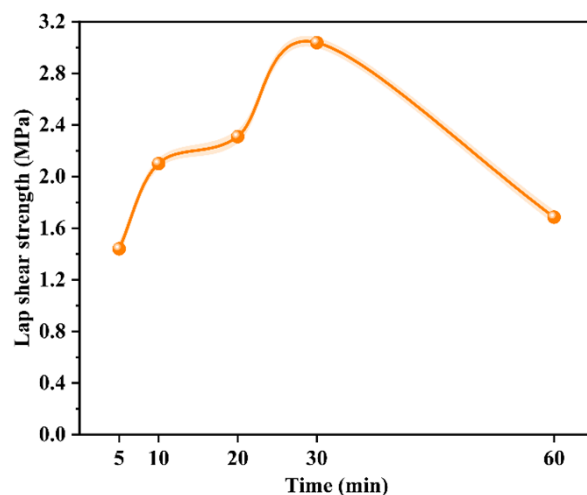

**Figure S2.** Lap shear strength of ESO/TA/CA adhesive with different curing times.

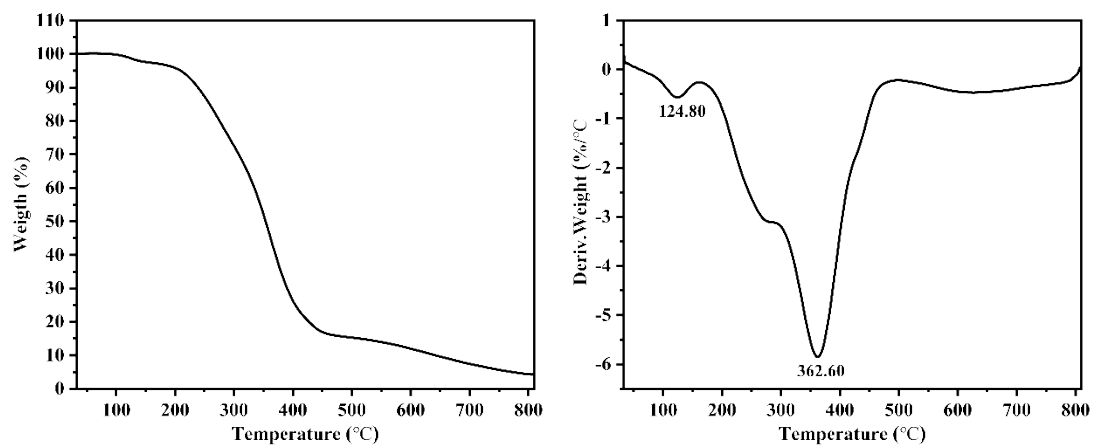

**Figure S3.** TG and TGA curves of the ESO/TA/CA adhesive (1:0.5:0.5)

Thermogravimetric analysis (TGA) was conducted on a NETZSCH STA 2500 instrument to evaluate the thermal stability of the ESO/TA/CA adhesive. Measurements were performed under a nitrogen atmosphere at a heating rate of 10 °C/min over a temperature range of 40 to 800 °C.

**Table S2.** Interfacial interactions for different substrates.

| Substrate | Interfacial interaction                     |
|-----------|---------------------------------------------|
| Aluminum  | Coordination interaction/Hydrogen bonding   |
| Steel     | Coordination interaction/Hydrogen bonding   |
| Wood      | Hydrogen bonding                            |
| PET       | Van der Waals interactions/Hydrogen bonding |

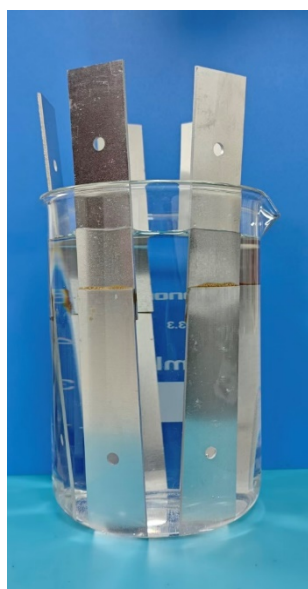

**Figure S4.** Photos of the water resistance test of the adhesive

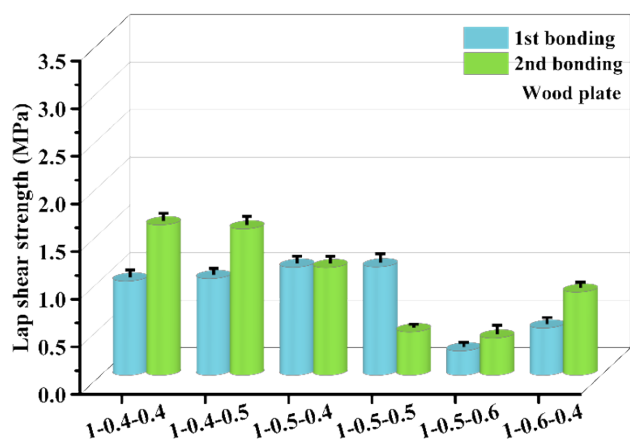

**Figure S5.** Reusability of the biomimetic adhesive on a wood plate

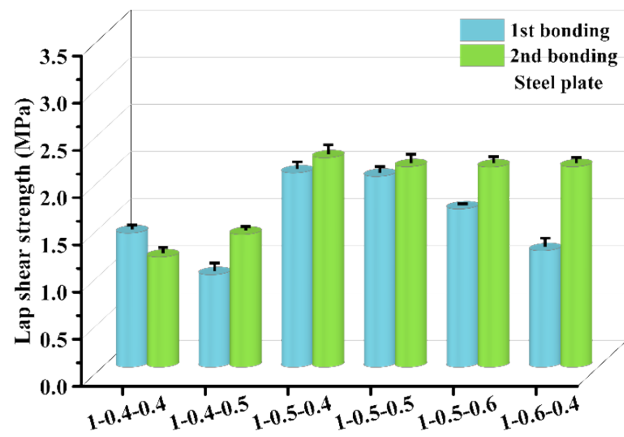

**Figure S6.** Reusability of the biomimetic adhesive on a steel plate

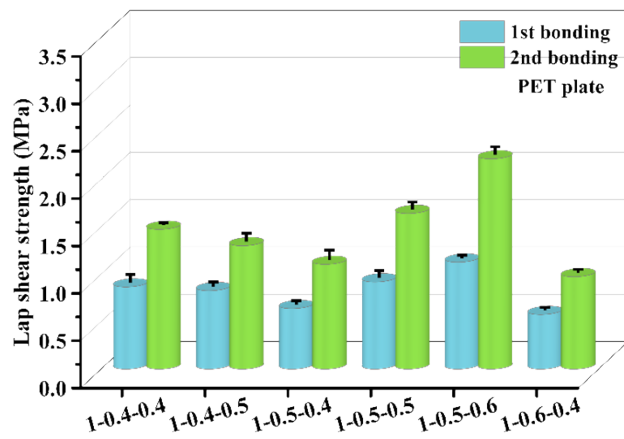

**Figure S7.** Reusability of the biomimetic adhesive on a PET plate

**Table S3.** Multi-parameter performance comparison between the ESO/TA/CA adhesive and reported reversible adhesives.

| Literatures                                            | Lap shear strength (MPa) | Residual ratio (%) | Main synthetic raw materials                                                                                                                                       | Healable / Healing efficiency (%) | Recyclable / Recycling method                  | Raw material cost / Sustainability       | Environmentally friendly |
|--------------------------------------------------------|--------------------------|--------------------|--------------------------------------------------------------------------------------------------------------------------------------------------------------------|-----------------------------------|------------------------------------------------|------------------------------------------|--------------------------|
| This work                                              | 3.04                     | 95                 | Epoxidized soybean oil (ESO), Tannic acid (TA), Citric acid (CA)                                                                                                   | Yes/93                            | Yes/Solvent evaporation recovery               | Low cost, high sustainability            | Yes                      |
| J. Mater. Chem. A 2025, 13(26), 21035-21047. Ref. [16] | 1.3                      | 95                 | Epoxidized soybean oil (ESO), Epoxy-functionalized polyolefin elastomer (EP-POE)                                                                                   | Yes/86                            | Yes / Hot pressing at 130 °C, 15 MPa for 5 min | High cost, low sustainability            | Relatively good          |
| Adv. Mater. 2021, 33(42), 2103674. Ref. [42]           | 1                        | 95                 | Cellulose nanocrystals (CNC), Poly (vinyl alcohol) (PA)                                                                                                            | Yes/101                           | Yes / Water spraying at the bonding interface  | Low cost, good sustainability            | Yes                      |
| Angew. Chem. 2021, 133(21), 12189-12196. Ref. [43]     | 0.6                      | 94                 | Chitosan (CS), Poly(N-isopropylacrylamide) copolymer (CS-g-PNIPAM)                                                                                                 | Yes/99                            | Yes / Cooling below 4 °C                       | Relatively low cost, good sustainability | Yes                      |
| Ind. Crops Prod. 2025, 235, 121712. Ref. [44]          | 1.59                     | 72                 | Oil tea cake protein (COP), Glyoxal (G), Melamine (M)                                                                                                              | No                                | No                                             | Low cost, high sustainability            | Yes                      |
| Int. J. Biol. Macromol. 2025, 145929. Ref. [45]        | 2.31                     | 75                 | Soy protein isolate (SPI), Sodium Carboxymethyl Cellulose (CMCNa), Lauroyl Arginine Ethyl Ester Hydrochloride (LAE), Triglycidylamine (TGA), Epichlorohydrin (ECH) | No                                | No                                             | Low cost, good sustainability            | Yes                      |
| Compos. Part B: Eng. 2025, 298, 112374. Ref. [46]      | 1.64                     | 90                 | Chitosan (CS), Tannic acid (TA), Nano-hydroxyapatite(n-HA), Tris(2-carboxyethyl) isocyanurate(TCI)                                                                 | No                                | No                                             | Relatively low cost, good sustainability | Yes                      |

|                                                                  |      |    |                                                                         |    |    |                                                    |     |
|------------------------------------------------------------------|------|----|-------------------------------------------------------------------------|----|----|----------------------------------------------------|-----|
| Colloids Surf.<br>A 2023, 671,<br>131722.<br>Ref. [47]           | 2.22 | 85 | Chitosan (CS),<br>Gallic acid (GA)                                      | No | No | Low cost,<br>high<br>sustainability                | Yes |
| Int. J. Biol.<br>Macromol.<br>2023, 242,<br>125095.<br>Ref. [48] | 2.78 | 43 | Soybean meal powder<br>(SM),<br>Silk fibroin (SF),<br>Tannic acid (TA)  | No | No | Relatively low<br>cost, high<br>sustainability     | Yes |
| Int. J. Biol.<br>Macromol.<br>2023, 253,<br>127135.<br>Ref. [49] | 1.65 | 96 | Soy protein isolate<br>(SPI),<br>Citric acid (CA)                       | No | No | Low cost,<br>high<br>sustainability                | Yes |
| Chem. Eng. J.<br>2023, 465,<br>142888.<br>Ref. [50]              | 2.05 | 61 | Aldehyde/Aminated<br>nanocellulose (DNC/A-<br>NC)                       | No | No | Relatively<br>high cost,<br>high<br>sustainability | Yes |
| Chem. Eng. J.<br>2023, 453,<br>139761.<br>Ref. [51]              | 2.1  | 55 | Soy protein isolate<br>(SPI),<br>Functionalized<br>nanomaterials (f-NM) | No | No | Low cost,<br>high<br>sustainability                | Yes |

**Table S4.** Healing efficiency of the adhesive with different healing durations.

| Healing time (min) | Healing efficiency (%) |
|--------------------|------------------------|
| 5                  | 8.55                   |
| 10                 | 55.09                  |
| 15                 | 76.19                  |
| 20                 | 88.65                  |

The healing efficiencies were calculated according to the following equation:

$$\text{Healing efficiency} = (\gamma - \beta) / (\alpha - \beta) \times 100\%$$

where  $\alpha$  is the stress or strain of the original plywood,  $\beta$  is the stress or strain of the damaged sample,  $\gamma$  is the stress or strain of the healed sample.

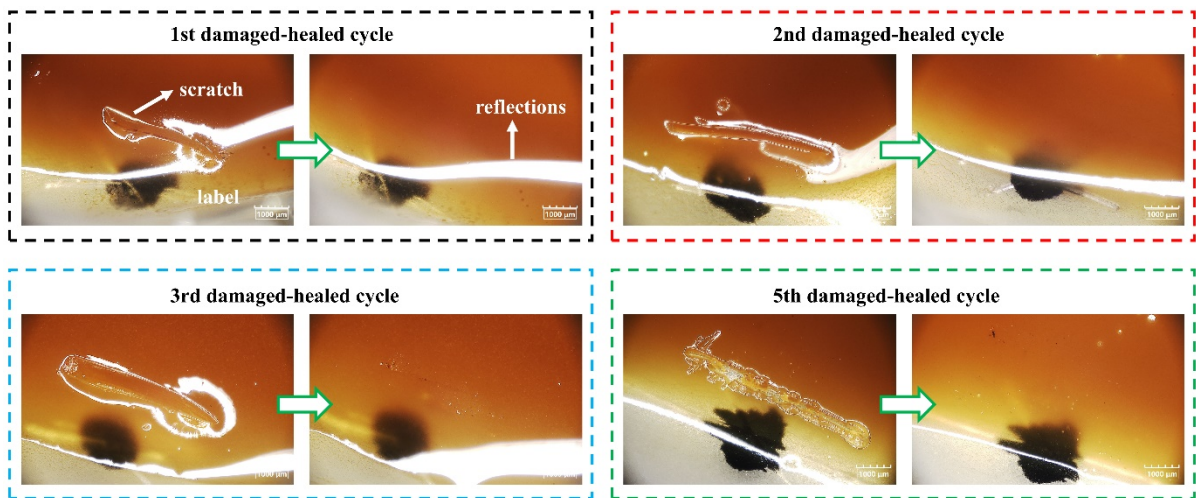

**Figure S8.** Surface morphology of the adhesive after multiple damage-healing cycles.

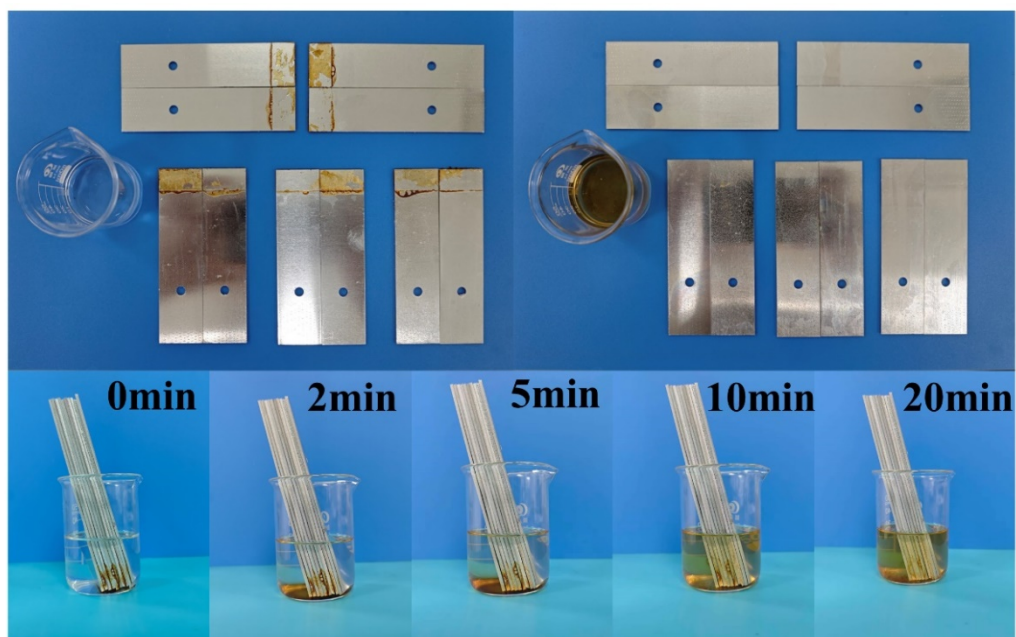

**Figure S9.** Digital photo of recycled ESO/TA/CA adhesive on the aluminum substrate

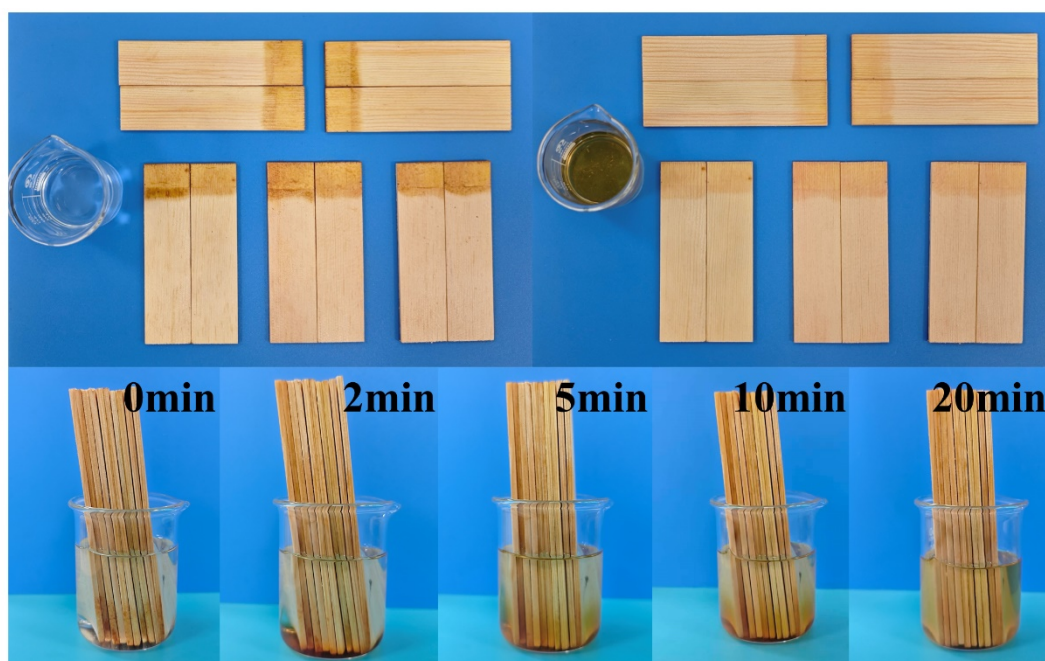

**Figure S10.** Digital photo of recycled ESO/TA/CA adhesive on the wood substrate

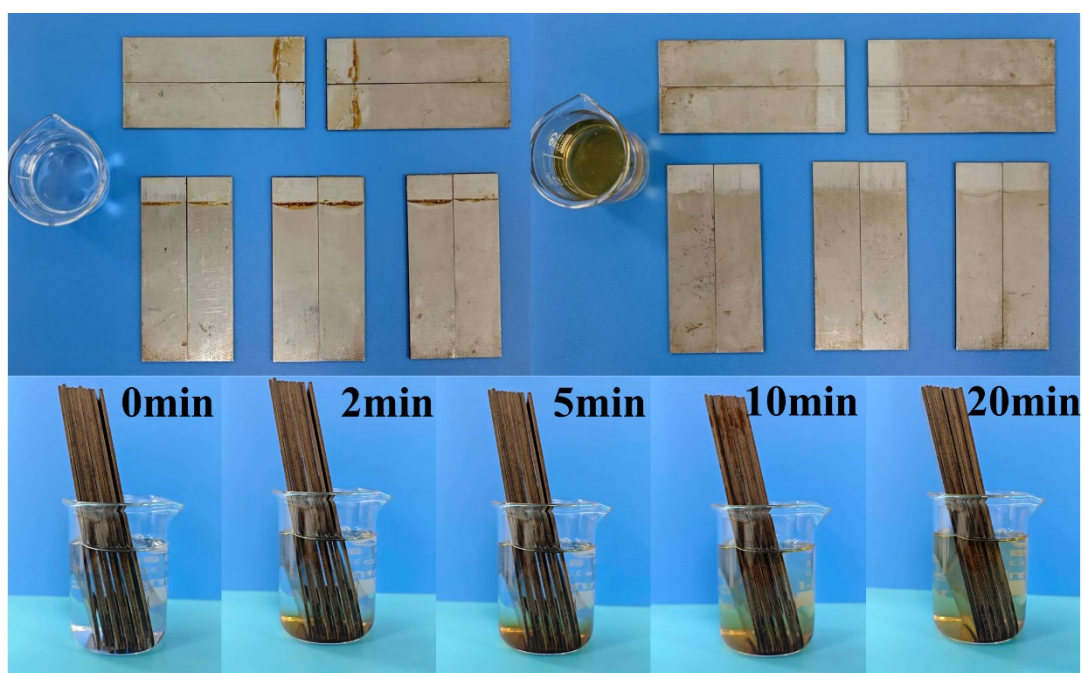

**Figure S11.** Digital photo of recycled ESO/TA/CA adhesive on the steel substrate

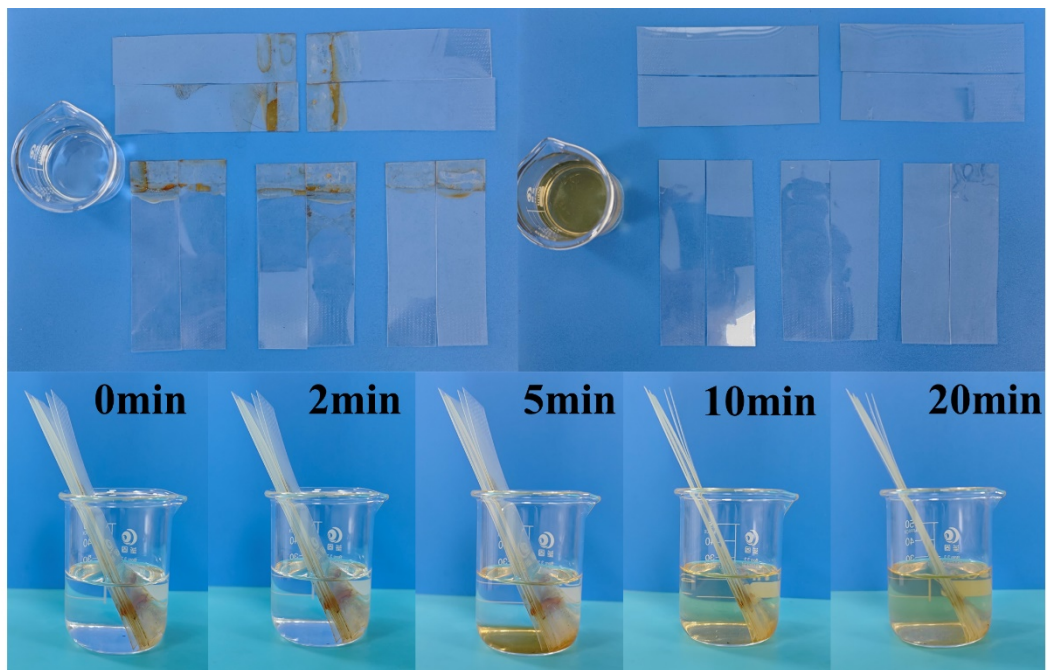

Figure S12. Digital photo of recycled ESO/TA/CA adhesive on the PET substrate

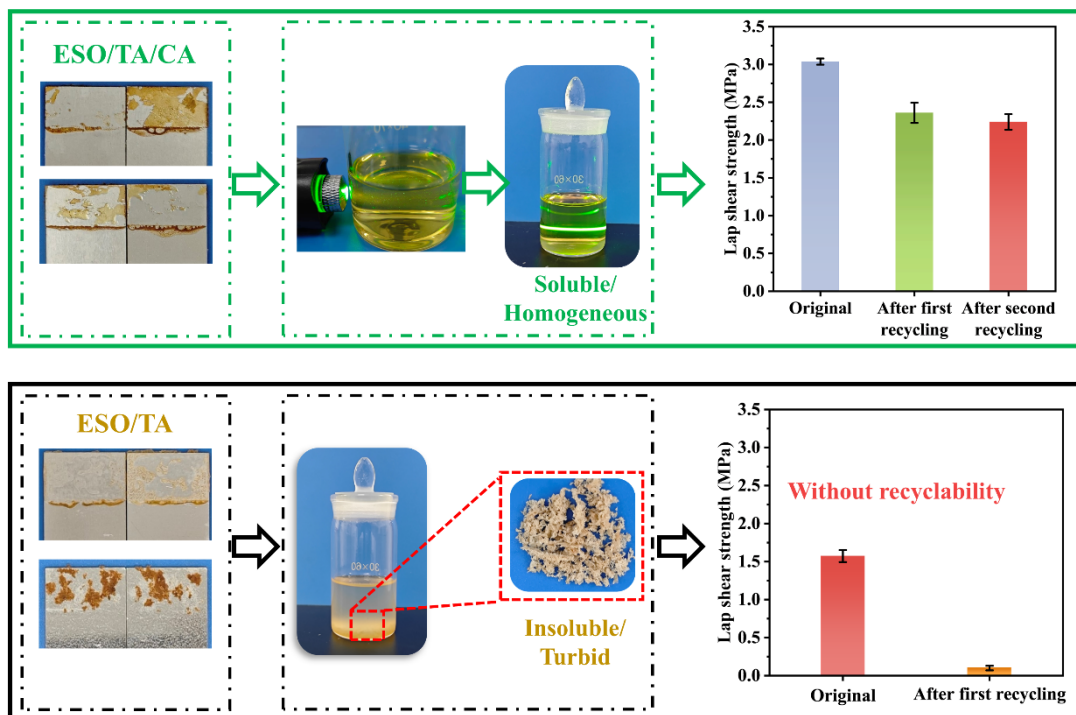

Figure S13. Comparison of the recycling processes of different adhesive systems.

**Table S5.** Comparison of reusability and recyclability pathways for the ESO/TA/CA adhesive.

|                      | Reusability                                                                         | Recyclability                                                                         |
|----------------------|-------------------------------------------------------------------------------------|---------------------------------------------------------------------------------------|
| Definition           | Thermally triggered re-bonding of the same adhesive piece after debonding           | Dissolution of the cured adhesive in ethanol and re-casting into a new entity         |
| Process              | Hot-pressing                                                                        | Ethanol dissolution & Hot-pressing                                                    |
| Mechanism            | In-situ rearrangement of dynamic covalent with minimal topological change           | Disassembly and reconstitution of the network with a more disruptive process          |
| Mechanical Retention | ~95%                                                                                | ~79%                                                                                  |
| Primary Advantage    | Suitable for efficient in-situ repair, simple operation with high property recovery | Enables complete green life-cycle management of the material, true chemical recycling |
